# Supplementary material for: Frequent patient retraining at home reduces the risks of peritoneal dialysis-related infections: A randomised study
Source: PubMed Central journal article supplement (PMC6110747; doi:10.1038/s41598-018-30785-z), 2018-08-27

**Frequent patient retraining at home  
reduces the risks of peritoneal dialysis-related infections  
: A randomised study**

<sup>1</sup>Jae Hyun Chang, M.D., Ph.D

<sup>2</sup>Jieun Oh, M.D., Ph.D

<sup>3</sup>Sue K. Park, M.D., Ph.D

<sup>3</sup>Juyeon Lee, M.S.

<sup>4</sup>Sung Gyun Kim, M.D., Ph.D

<sup>2</sup>Soo Jin Kim, M.D.

<sup>2</sup>Dong Ho Shin, M.D.

<sup>5</sup>Young-Hwan Hwang, M.D., Ph.D

<sup>6</sup>Wookyung Chung, M.D., Ph.D

<sup>7</sup>Hyunwook Kim, M.D., Ph.D

<sup>8</sup>Kook-Hwan Oh, M.D., Ph.D.

Representing Trial on Education And Clinical outcomes for Home PD patients (**TEACH**)

**Investigators**

Corresponding Author ;

Kook-Hwan Oh, MD, PhD.

Department of Internal Medicine, Seoul National University College of Medicine,

Chongno Gu, Seoul, 03080, Korea

Tel: +82-2-2072-0776, Fax: +82-2-741-4876

Email: [ohchris@hanmail.net](mailto:ohchris@hanmail.net)

JHC and JO equally contributed to this work.

<sup>1</sup>Department of Internal Medicine, Gachon University Gil Medical Center, Gachon University School of Medicine, Namdong Gu, Incheon, 21565, Korea

<sup>2</sup>Department of Internal Medicine, Kangdong Sacred Heart Hospital, Hallym Kidney Research Institute, Hallym University, Kangdong Gu, Seoul, 05355, Korea

<sup>3</sup>Department of Preventive Medicine, Seoul National University College of Medicine, Seoul, Korea; Department of biomedical Science, Seoul National University College of Medicine, Seoul, Korea; Cancer Research Institute, Seoul National University, Chongno Gu, Seoul, 03080, Korea

<sup>4</sup>Department of Internal Medicine, Hallym University Sacred Heart Hospital, Dongan Gu, Anyang, Gyeonggi-do, 14068, Korea

<sup>5</sup>Department of Internal Medicine, Eulji University College of Medicine, Hangeul Biseok Ro, Seoul, 01830, Korea.

<sup>6</sup>Department of Internal Medicine, Gachon University Gil Medical Center, Gachon University School of Medicine, Namdong Gu, Incheon, 21565, Korea

<sup>7</sup>Department of Internal Medicine, Yonsei University College of Medicine, Gangnam Severance Hospital, Kangnam Gu, Seoul, 06273, Korea

<sup>8</sup>Department of Internal Medicine, Seoul National University College of Medicine, Seoul, Korea

Supplementary Table 1. Contents for patient education and training

|                                         |                                       |
|-----------------------------------------|---------------------------------------|
| 1. What does the kidney do in our body? | • Location of the kidney              |
|                                         | • Functions of the kidney             |
|                                         | • What if the kidney stops working    |
| 2. What is peritoneal dialysis?         | • What is PD?                         |
|                                         | • PD catheter insertion               |
|                                         | • How is the water and waste removed? |
|                                         | • Types of PD                         |
| 3. Care of PD                           | • How PD fluid is exchanged?          |
|                                         | • PD fluid exchange procedure         |
|                                         | • Exit care                           |
|                                         | • Shower                              |
|                                         | • Water balance                       |
| 4. Infectious complication              | • Peritonitis                         |
|                                         | • Exit site infection                 |
| 5. Diet                                 | • Protein                             |
|                                         | • Carbohydrate                        |
|                                         | • P                                   |
|                                         | • K                                   |
|                                         | • Na                                  |
|                                         | • Water                               |
| 6. Drugs                                | • anti-hypertensive drugs             |
|                                         | • P binder                            |
|                                         | • Vitamin D                           |
|                                         | • Iron agents                         |

|                        |                                                                                   |
|------------------------|-----------------------------------------------------------------------------------|
|                        | <ul style="list-style-type: none"> <li>• Laxatives</li> </ul>                     |
|                        | <ul style="list-style-type: none"> <li>• Erythropoietin and other ESAs</li> </ul> |
|                        | <ul style="list-style-type: none"> <li>• Insulin (in case of diabetes)</li> </ul> |
|                        | <ul style="list-style-type: none"> <li>• Heparin</li> </ul>                       |
|                        | <ul style="list-style-type: none"> <li>• Antibiotics</li> </ul>                   |
| 7. Trouble shooting    | 1) Infusion/drain problems                                                        |
|                        | 2) Contamination during exchange                                                  |
|                        | 3) Turbid effluent                                                                |
|                        | 4) Fibrin in effluent                                                             |
|                        | 5) Bloody effluent                                                                |
|                        | 6) Dark yellow effluent                                                           |
|                        | 7) Catheter leakage                                                               |
|                        | 8) Leakage from PD fluid bag                                                      |
|                        | 9) Peri-catheter leak                                                             |
|                        | 10) Abdominal pain                                                                |
|                        | 11) Shoulder pain                                                                 |
|                        | 12) Exit pain                                                                     |
| 8. PD and life         | <ul style="list-style-type: none"> <li>• Daily life</li> </ul>                    |
|                        | <ul style="list-style-type: none"> <li>• Sexual life</li> </ul>                   |
|                        | <ul style="list-style-type: none"> <li>• Exercise</li> </ul>                      |
|                        | <ul style="list-style-type: none"> <li>• Travel</li> </ul>                        |
| 9. PD fluid management | <ul style="list-style-type: none"> <li>• PD fluid prescription</li> </ul>         |
|                        | <ul style="list-style-type: none"> <li>• PD fluid delivery</li> </ul>             |

Supplementary Table 2. Checklist for PD training (for the first home visit)

| Title               | Content                                                                                                                                                                                                                                                                                                                                                                                                          | Reference           |
|---------------------|------------------------------------------------------------------------------------------------------------------------------------------------------------------------------------------------------------------------------------------------------------------------------------------------------------------------------------------------------------------------------------------------------------------|---------------------|
| Understanding of PD | <ul style="list-style-type: none"> <li>-Kidney function and ESRD</li> <li>-PD vs. HD</li> <li>-Principles of PD</li> <li>-Exchange method with demonstration (aseptic technique, PD environment)</li> <li>-Record the PD diary</li> <li>-Fluid balance</li> <li>-Diet &amp; Exercise</li> <li>- Problem solving</li> <li>- Exit care and shower</li> <li>-T-set exchange period</li> <li>- Medication</li> </ul> | PD education manual |
| PD price            | <ul style="list-style-type: none"> <li>-PD solution price</li> <li>-payment method</li> </ul>                                                                                                                                                                                                                                                                                                                    |                     |
| Delivery            | <ul style="list-style-type: none"> <li>-Domestic delivery</li> <li>-No refund, exchange and delivery without prescription</li> <li>-collection of waste bag</li> </ul>                                                                                                                                                                                                                                           |                     |
| Benefit             | <ul style="list-style-type: none"> <li>-Handicapped</li> <li>-Support from government/National pension</li> </ul>                                                                                                                                                                                                                                                                                                |                     |
| Before going home   | <ul style="list-style-type: none"> <li>-prepare the supply</li> <li>-delivery the solution</li> <li>-patient test</li> </ul>                                                                                                                                                                                                                                                                                     |                     |

Supplementary Table 3. Checklist for retraining during home visits

|                                                                                                                                                                                                                                                                                                                                                                                               |     |    |
|-----------------------------------------------------------------------------------------------------------------------------------------------------------------------------------------------------------------------------------------------------------------------------------------------------------------------------------------------------------------------------------------------|-----|----|
| Patient name:                                                                                                                                                                                                                                                                                                                                                                                 |     |    |
| Date:                                                                                                                                                                                                                                                                                                                                                                                         |     |    |
| If retraining is the result of a peritonitis episode, what do you think was the cause?:                                                                                                                                                                                                                                                                                                       |     |    |
| <b>Hand Washing</b>                                                                                                                                                                                                                                                                                                                                                                           | Yes | No |
| Hand washing technique is adequate<br>Soap is adequate<br>Washing time is adequate<br>Good technique for drying hands<br>No decantation of liquid soap                                                                                                                                                                                                                                        |     |    |
| <b>Exchange Technique</b>                                                                                                                                                                                                                                                                                                                                                                     | Yes | No |
| The patient does an exchange:<br>In a suitable room<br>Around animals<br>Checks date, volume, leak in the bag<br>Disinfects the work surface correctly<br>Mask<br>Does the connection the right way<br>“Flush before Fill” is done according to the technique<br>The date of the MiniCap is observed<br>Does the disconnection the right way<br>Reconnects to the MiniCap the right way       |     |    |
| <b>Cycler technique</b>                                                                                                                                                                                                                                                                                                                                                                       | Yes | No |
| The patient:<br>In a suitable room<br>Around animals<br>Checks date, volume, leak in the bag<br>Is very familiar with his or her programming<br>Is able to change the programming<br>Mask<br>Connects the bags and tubing correctly<br>Does the priming the right way<br>Does the connection the right way<br>Does the disconnection the right way<br>Reconnects to the MiniCap the right way |     |    |
| <b>I know what I have to do if:</b>                                                                                                                                                                                                                                                                                                                                                           | Yes | No |
| I see that my fluid is cloudy<br>I am constipated<br>I am bloated<br>I am dehydrated or tired<br>I contaminate my transfer line<br>I have fibrin in my drain fluid                                                                                                                                                                                                                            |     |    |
| <b>I must do every day</b>                                                                                                                                                                                                                                                                                                                                                                    | Yes | No |
| Weigh myself<br>Take my blood pressure<br>Take note of my general condition (swelling, etc.)<br>Observe my drain fluid                                                                                                                                                                                                                                                                        |     |    |
| Comments:                                                                                                                                                                                                                                                                                                                                                                                     |     |    |

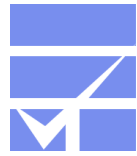

# CONSORT

TRANSPARENT REPORTING of TRIALS

## CONSORT 2010 Flow Diagram

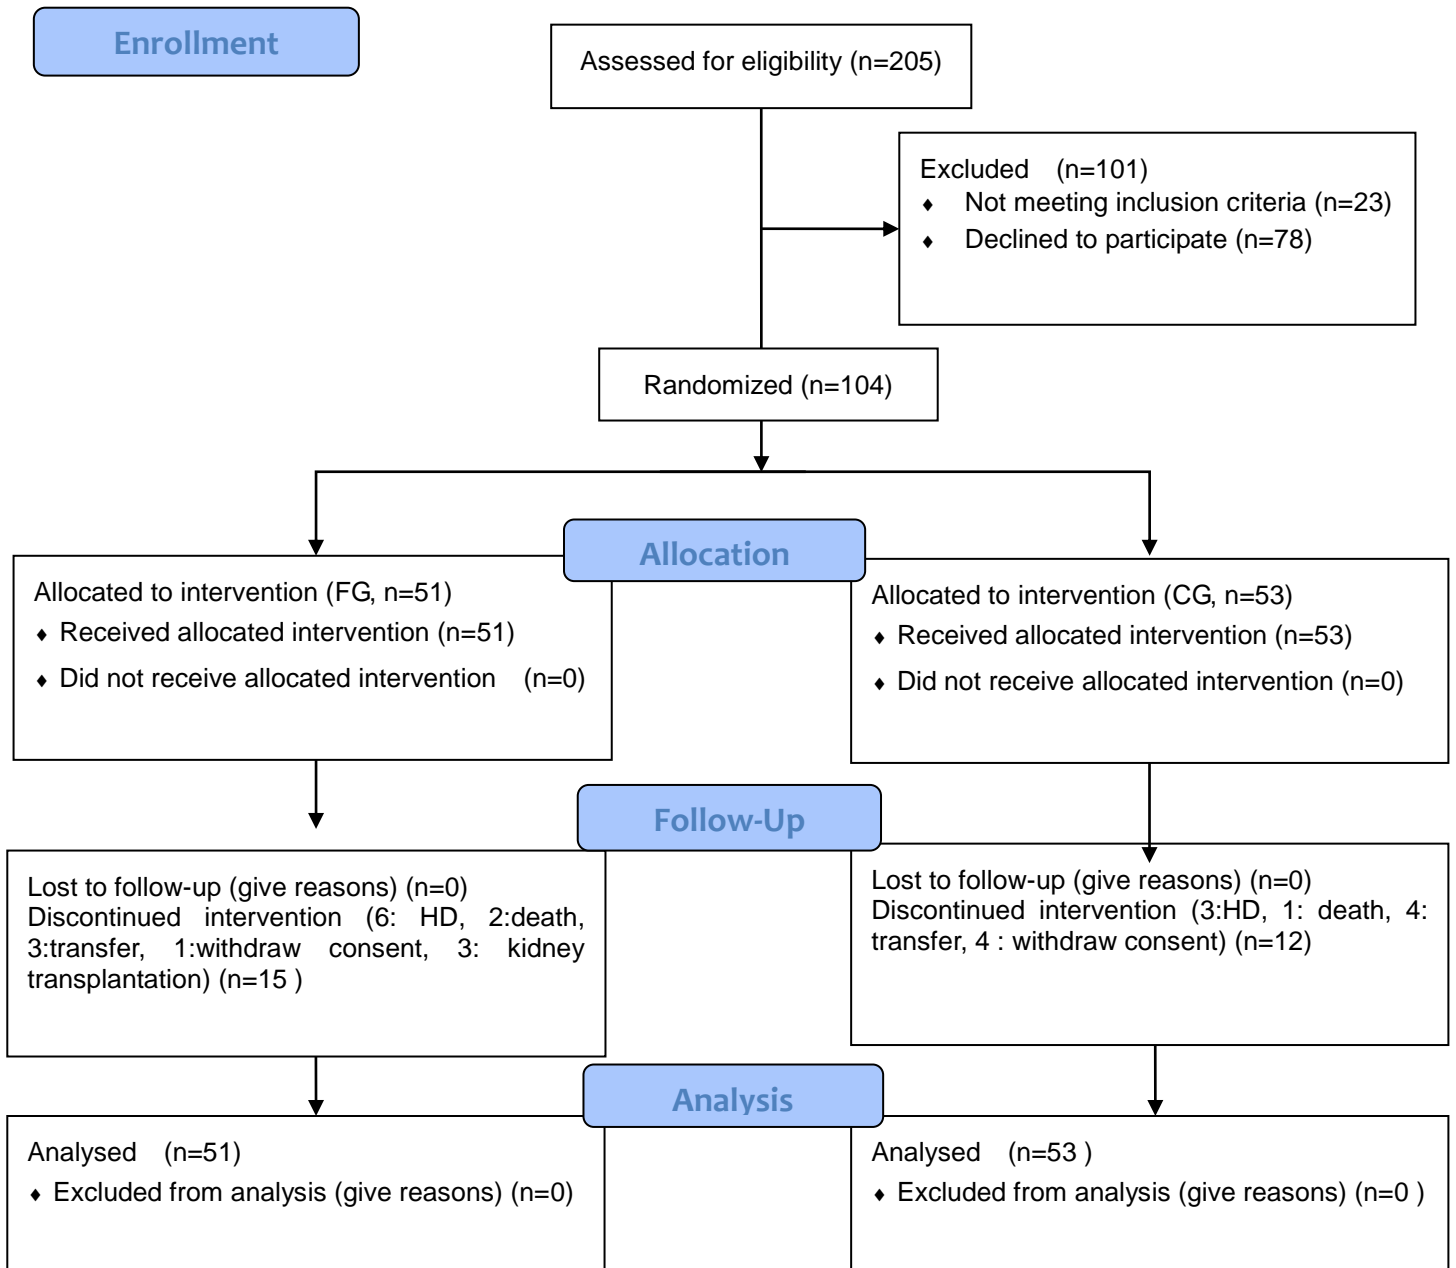

Supplement: 41598_2018_30785_MOESM1_ESM.pdf [file 41598_2018_30785_MOESM1_ESM.pdf]
